# Supplementary material for: Effects of exogenous zinc on the physiological characteristics and enzyme activities of Passiflora edulis Sims f. edulis seedlings
Source: PeerJ. 2023 Oct 18;11:e16280. doi: 10.7717/peerj.16280 (PMC10590096; doi:10.7717/peerj.16280)
Supplement: Data S1 [file peerj-11-16280-s001.xlsx]

## Sheet: Leaf
Zn concentration (mg/Kg)	Repeat	leaf area (cm2)	leaf perimeter (cm)	leaf length (cm)	leaf width (cm)
0	1	136.445	68.04	14.1	14.94
	2	113.826	66.22	13	14.53
	3	130.085	67.28	14.7	14.81
200	1	134.216	67.21	15.3	13.63
	2	108.478	60.18	13.7	12.06
	3	114.376	67.41	12.8	13.93
400	1	95.611	60.76	13.4	12.23
	2	98.81	60.75	13.1	13.56
	3	110.807	61.37	14.3	13.19
800	1	79.932	55.58	12.6	11.26
	2	106.016	65.12	12.9	13.95
	3	105.538	64.07	12.7	14.12

## Sheet: Photosynthetic pigments
Zn concentration (mg/Kg)	Repeat	Sample weighing (g)	A665	A649	A470
0	1	0.2	1.229	0.552	1.355
	2	0.2	0.907	0.409	0.986
	3	0.2	1.135	0.507	1.23
200	1	0.2	1.6	0.725	1.711
	2	0.2	1.38	0.625	1.477
	3	0.2	1.533	0.692	1.618
400	1	0.2	1.248	0.561	1.264
	2	0.2	1.402	0.631	1.394
	3	0.2	1.172	0.527	1.171
800	1	0.2	1.36	0.61	1.458
	2	0.2	1.268	0.57	1.381
	3	0.2	1.197	0.534	1.324

## Sheet: Malondialdehyde
Zn concentration (mg/Kg)	Repeat	Sample weighing (g)	V (ml)	V2 (ml)	A450	A532	A600
0	1	0.2	4.2	3.3	0.502	0.156	0.024
	2	0.2	4.2	3.3	0.503	0.155	0.024
	3	0.2	4.2	3.3	0.56	0.169	0.026
200	1	0.2	4.1	3.3	0.51	0.164	0.025
	2	0.2	4.3	3.3	0.505	0.161	0.021
	3	0.2	4.2	3.3	0.511	0.162	0.022
400	1	0.2	4.1	3.4	0.62	0.224	0.042
	2	0.2	4.1	3.3	0.657	0.238	0.053
	3	0.2	4.1	3.2	0.679	0.244	0.046
800	1	0.2	4.1	3.3	0.546	0.204	0.048
	2	0.2	4	3.4	0.559	0.228	0.051
	3	0.2	4	3.3	0.545	0.198	0.035

## Sheet: Soluble sugar
Zn concentration (mg/Kg)	Repeat	Sample weighing (g)	A630
0	1	0.2	0.926
	2	0.2	0.777
	3	0.21	0.81
200	1	0.19	0.74
	2	0.19	0.672
	3	0.2	0.656
400	1	0.2	0.847
	2	0.2	0.678
	3	0.2	0.639
800	1	0.2	0.59
	2	0.2	0.511
	3	0.2	0.517

## Sheet: Proline
Zn concentration (mg/Kg)	Repeat	Sample weighing (g)	A520
0	1	0.33	1.131
	2	0.32	1.102
	3	0.32	1.168
200	1	0.11	1.893
	2	0.1	1.31
	3	0.12	1.829
400	1	0.3	2.389
	2	0.32	2.233
	3	0.3	2.382
800	1	0.3	3.031
	2	0.3	3.088
	3	0.32	3.799

## Sheet: CAT
Zn concentration (mg/Kg)	Repeat	Sample weighing (g)	A405	Control
0	1	0.103	1.0542	1.9566
	2	0.103	1.0684	2.1471
	3	0.102	1.0313	1.9986
200	1	0.102	2.2732	3.533
	2	0.101	2.0517	3.3518
	3	0.1	2.1987	2.9675
400	1	0.104	2.0284	3.1211
	2	0.103	1.8109	2.8389
	3	0.1	2.1752	3.4791
800	1	0.103	2.2095	3.3457
	2	0.102	1.9065	2.9339
	3	0.103	1.8916	3.1459

## Sheet: POD
Zn concentration (mg/Kg)	Repeat	Sample weighing (g)	A470（1)	A470（2）
0	1	0.101	0.0957	0.1205
	2	0.103	0.1043	0.1306
	3	0.1	0.1123	0.1496
200	1	0.102	0.1624	0.2045
	2	0.101	0.1191	0.1466
	3	0.1	0.1313	0.1618
400	1	0.104	0.1889	0.2189
	2	0.103	0.2455	0.2874
	3	0.1	0.1772	0.2114
800	1	0.102	0.1474	0.2012
	2	0.103	0.1216	0.1675
	3	0.101	0.1264	0.1755

## Sheet: SOD
Zn concentration (mg/Kg)	Repeat	Sample weighing (g)	A450	Control
0	1	0.1	0.2058	0.6151
	2	0.103	0.2308	0.6151
	3	0.1	0.2102	0.6151
200	1	0.103	0.2873	0.6151
	2	0.1	0.2572	0.6151
	3	0.103	0.2674	0.6151
400	1	0.104	0.294	0.6151
	2	0.105	0.3394	0.6151
	3	0.1	0.3068	0.6151
800	1	0.101	0.2911	0.6151
	2	0.1	0.2634	0.6151
	3	0.103	0.3025	0.6151
